# Supplementary material for: Polystyrene-block-poly(methylmethacrylate) composite material film as a gate dielectric for plastic thin-film transistor applications
Source: Royal Society of Chemistry journal article supplement (doi:10.1039/c4ra01517g), 2014-01-01
Supplement: c4ra01517g1.pdf [file c4ra01517g1.pdf]

## **Supporting Information**

# Polystyrene-Block-Poly (methacrylate) Composite Materials Film as a Gate Dielectric for Plastic Thin-Film Transistor Applications

Jagan Singh Meena<sup>ab</sup>, Min-Ching Chu<sup>a</sup>, Ranjodh Singh<sup>a</sup>, Chung-Shu Wu<sup>a</sup>, Umesh Chand<sup>b</sup>, Hsin-Chiang You<sup>c</sup>, Po-Tsun Liu<sup>a</sup>, Han-Ping D. Shieh<sup>a</sup> and Fu-Hsiang Ko<sup>a\*</sup>

<sup>a</sup>Department of Materials Science and Engineering, Department of Photonics and Display Institute, National Chiao Tung University, Hsinchu 30010, ROC, Taiwan

<sup>b</sup>Department of Electronics Engineering, National Chiao Tung University, Hsinchu 30010, ROC, Taiwan

<sup>c</sup>Department of Electronic Engineering, National Chin–Yi University of Technology, Taichung 41170, ROC, Taiwan.

\*E-mail: [fhko@mail.nctu.edu.tw](mailto:fhko@mail.nctu.edu.tw)

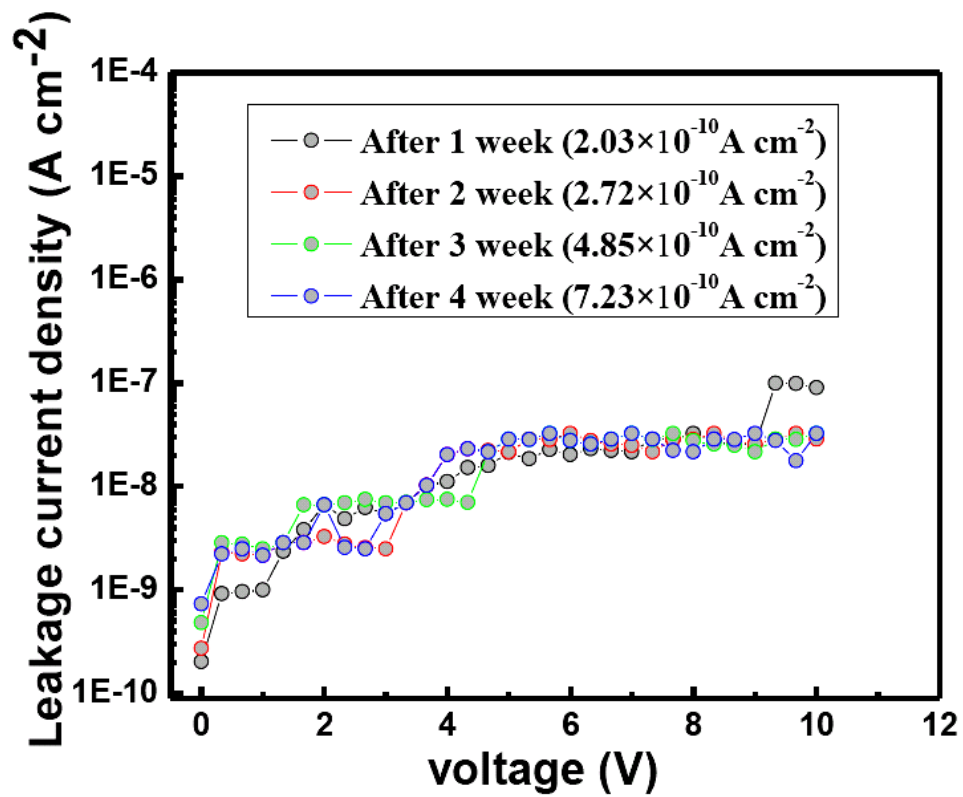

**Figure S1.** Leakage current density measurements test for 1 day to 4 weeks for double layer PS-*b*-PMMA film (28 nm thick) as dielectric layer in MIM structured device.

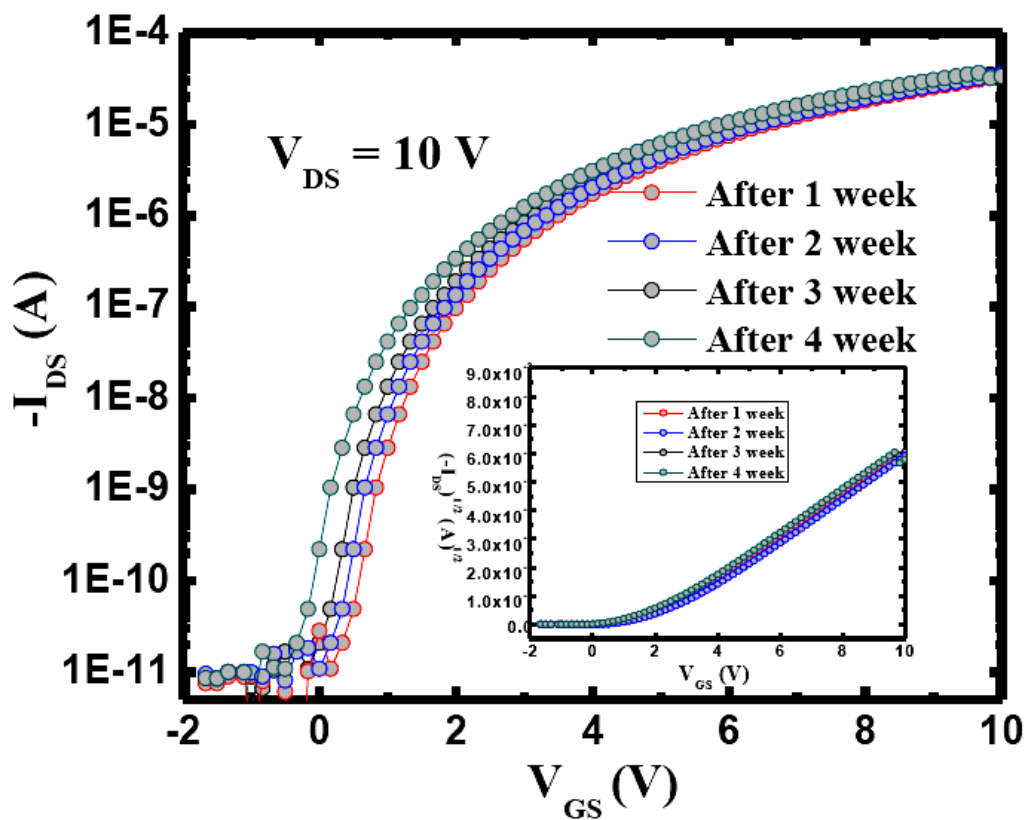

**Figure S2.** Transfer characteristic ( $I_{DS}-V_{GS}$ ), when  $V_{DS}=10$  V for double layer PS-*b*-PMMA film (28 nm thick) as gate dielectric layer and ZnO as semiconductor active layer for day 1 to 4 weeks.
